# Supplementary material
Source: MDPI journal article supplement (https://www.mdpi.com/2071-1050/14/3/1716)
Supplement: s1 [file s1]

### **Supplementary Material**

“Upscaling via a Prospective LCA: A Case Study on Tomato Homogenate Using a Near-to-Market Pasteurisation Technology”

Calero, M.; Clemente, G.; Fartdinov, D.; Bañón, S.; Muñoz, I.; Sanjuán, N.

**Table S1.** Characteristics of the equipment and processing time of the pilot plant.

| <b>Unit process at pilot scale</b> | <b>Power (kW)</b> | <b>Processing time</b> |
|------------------------------------|-------------------|------------------------|
| Grinding                           | 6                 | 30 s for 20 kg         |
| Sieving                            | 0.65              | 10 s for 1 kg          |
| Mixing                             | 0.35              | 30 min                 |
| Homogenisation                     | 5.50              | 5 min                  |
| 2 Pumps                            | 1.1               | -                      |

**Table S2.** Inventory data for organic waste management at large scale scenario.

| <b>Data</b>                                  | <b>Value</b> | <b>Inventory process (source)</b>                                                    |
|----------------------------------------------|--------------|--------------------------------------------------------------------------------------|
| Landfill (kg waste)                          | 0.05         | Municipal solid waste on landfill (GaBi DB v.9)                                      |
| Valorisation:                                |              |                                                                                      |
| Natural gas (kWh · kg waste <sup>-1</sup> )  | 0.5346       | Heat production, natural gas, at boiler condensing modulating <100kW (Ecoinvent 3.6) |
| Soybean (kg · kg dried waste <sup>-1</sup> ) | 0.0922       | Soybean meal and crude oil production (Ecoinvent 3.6)                                |
| Barley (kg · kg dried waste <sup>-1</sup> )  | 0.0184       | Barley production, Swiss integrated production, intensive (Ecoinvent 3.6)            |
| Wheat (kg · kg dried waste <sup>-1</sup> )   | 0.0089       | Wheat grain processing, dry milling (Ecoinvent 3.7.1)                                |

**Table S3.** Processing capacity (throughput) and power of RF machines [65].

| <b>Name</b> | <b>Throughput (l·h<sup>-1</sup>)</b> | <b>Power (kW)</b> |
|-------------|--------------------------------------|-------------------|
| RF270       | 10000                                | 270               |
| RF135       | 5000                                 | 135               |

|      |      |                 |
|------|------|-----------------|
| RF70 | 3000 | 70              |
| RF45 | 2000 | 45 <sup>1</sup> |
| RF20 | 300  | 20              |

<sup>1</sup>RF equipment used in the pilot plant.

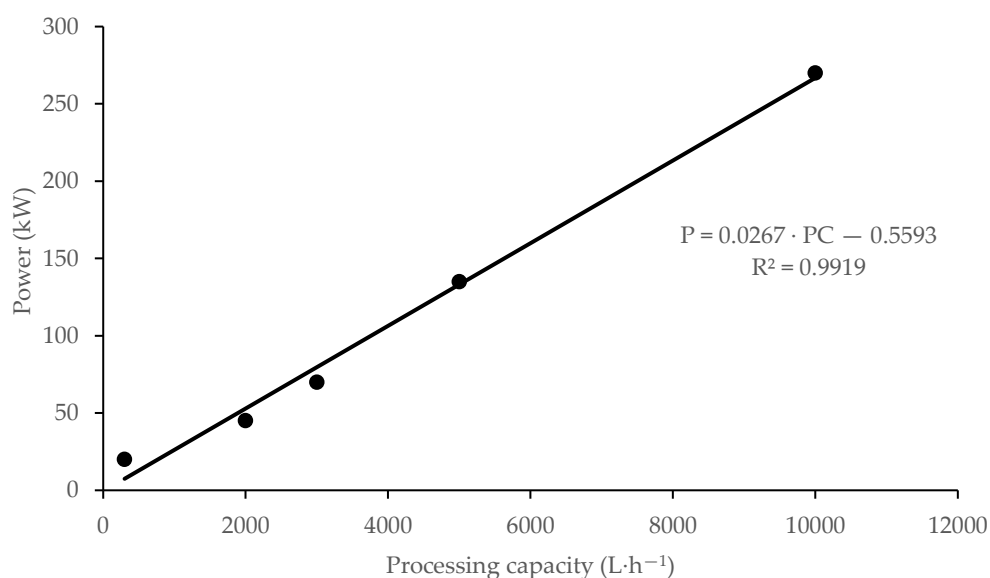

**Figure S1.** Linear relationship between power (P, kW) and processing capacity (PC, L·h<sup>-1</sup>).

**Table S4.** Spanish electric mix in 2020 and 2040 and inventory processes used in the prospective LCA. Data of the shares of the electricity mix have been taken from Navas-Anguila [85].

|                              | Share<br>2020 | Share2040 | Type of electricity (data source)                                                               |
|------------------------------|---------------|-----------|-------------------------------------------------------------------------------------------------|
| Oil combustion turbine plant | 3.4%          | 0.0%      | Electricity production, oil (Ecoinvent 3.6)                                                     |
| NGCC plant                   | 15.0%         | 0.8%      | Electricity production, natural gas, combined cycle power plant (Ecoinvent 3.6)                 |
| Cogeneration plant           | 7.1%          | 5.3%      | Heat and power co-generation, oil (Ecoinvent 3.6)                                               |
| Nuclear fission plant        | 20.4%         | 0.0%      | Electricity production, nuclear boiling water reactor (Ecoinvent 3.6)                           |
| Hydropower plant             | 11.9%         | 10.6%     | Electricity production, hydro, run-of-river (Ecoinvent 3.6)                                     |
| Solar PV plant               | 12.9%         | 28.8%     | Electricity production, photovoltaic, 570kWp open ground installation, multi-Si (Ecoinvent 3.6) |

|                       |       |       |                                                                                                                       |
|-----------------------|-------|-------|-----------------------------------------------------------------------------------------------------------------------|
| Solar thermal plant   | 6.5%  | 11.7% | Electricity production, solar thermal parabolic trough, 50MW (Ecoinvent 3.6)                                          |
| Wind onshore plant    | 18.7% | 27.7% | Electricity production, wind, 1-3MW turbine, onshore (Ecoinvent 3.6)                                                  |
| Wind offshore plant   | 0.7%  | 7.8%  | Electricity production, wind, 1-3MW turbine, offshore (Ecoinvent 3.6)                                                 |
| Biomass plant         | 2.0%  | 2.2%  | Electricity from biomass (GaBi DB v9)                                                                                 |
| Biogas plant          | 0.3%  | 0.3%  | Heat and power co-generation, biogas, gas engine (Ecoinvent 3.6)                                                      |
| Waste-to-energy plant | 0.3%  | 2.5%  | Electricity from municipal solid waste incineration to generic market for electricity, medium voltage (Ecoinvent 3.6) |
| Geothermal plant      | 0.3%  | 2.0%  | Electricity production, deep geothermal (Ecoinvent 3.6)                                                               |
| Coal thermal plant    | 0.3%  | 0.3%  | Electricity production, hard coal (Ecoinvent 3.6)                                                                     |

---
